# Supplementary material for: Flexible and stable lithium ion batteries based on three-dimensional aligned carbon nanotube/silicon hybrid electrodes
Source: Royal Society of Chemistry journal article supplement (doi:10.1039/c4ta00711e), 2014-01-01
Supplement: c4ta00711e1.pdf [file c4ta00711e1.pdf]

## Supplementary Information

For the mechanical measurement, the 3D aligned CNT/Si hybrid was cut to form rectangular strips with sizes of 60 mm × 5 mm. The thickness was measured by SEM. The samples were tested on a HY0350 table-top universal testing instrument. The electrodes were loaded in a uniaxial tension at a rate of 1 mm min<sup>-1</sup> with a gauge length of 40 mm. To test the tensile properties after cycling, the electrode strips were electrochemically cycled in a sealed glass tube with lithium foil as a counter electrode using 1 M of LiPF<sub>6</sub> in a mixture of ethylene carbonate and diethyl carbonate (volume ratio of 1/1) as the electrolyte. After cycling, the electrode strips were soaked in acetonitrile overnight to wash the residual electrolyte. They had been finally rinsed with deionized water prior to the mechanical measurement.

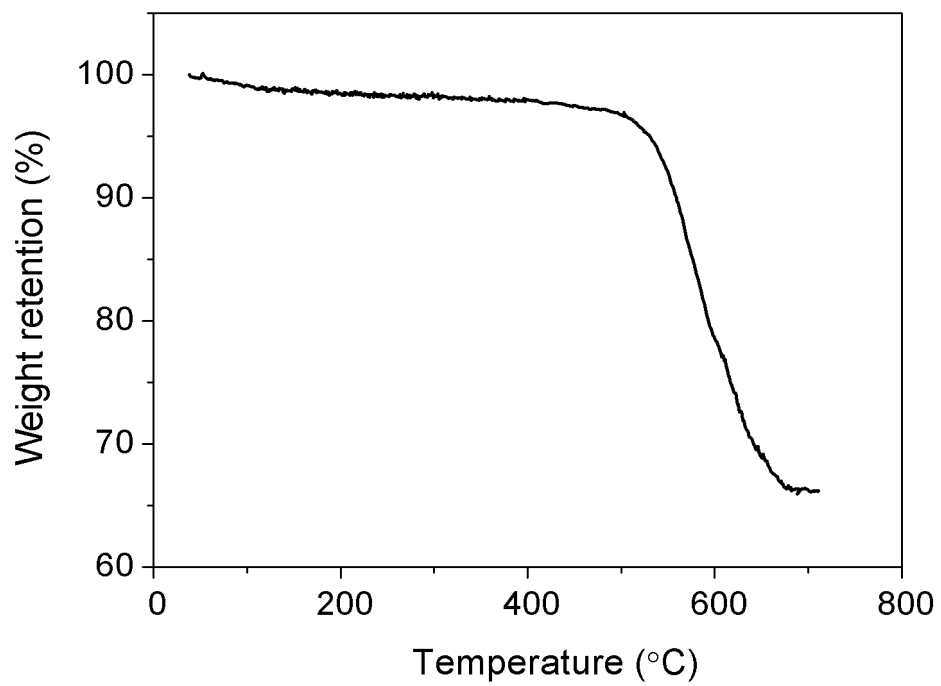

**Figure S1.** Thermogravimetric analysis of the 3D aligned CNT/Si hybrid in air.

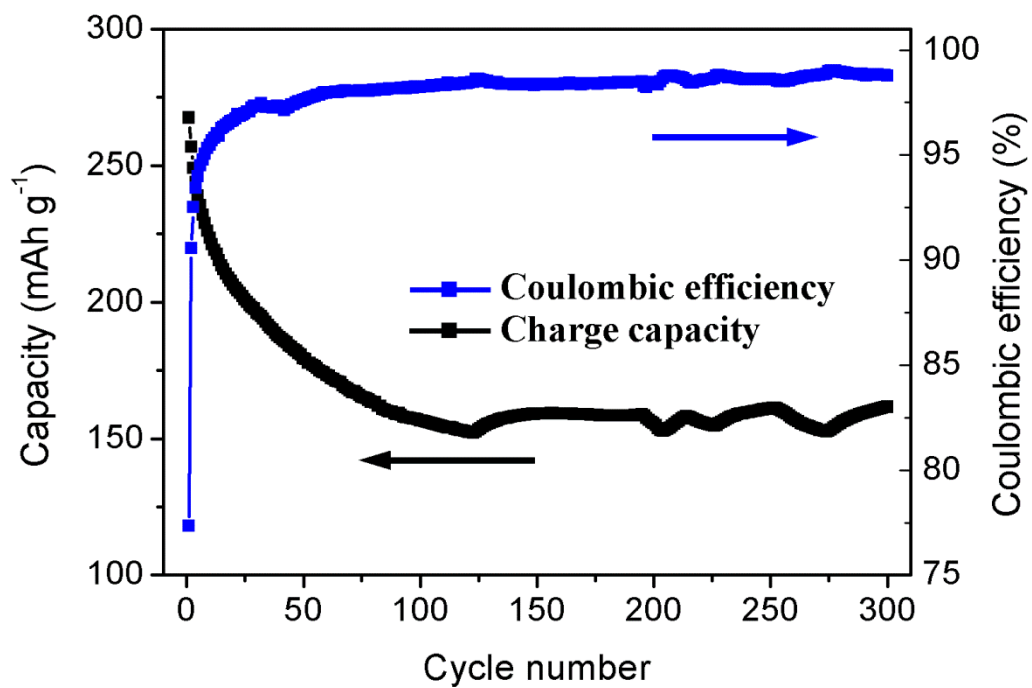

**Figure S2.** Cyclic performance of the bare CNT at a current density of 1 A g<sup>-1</sup> at a voltage range between 3 and 0.005 V.

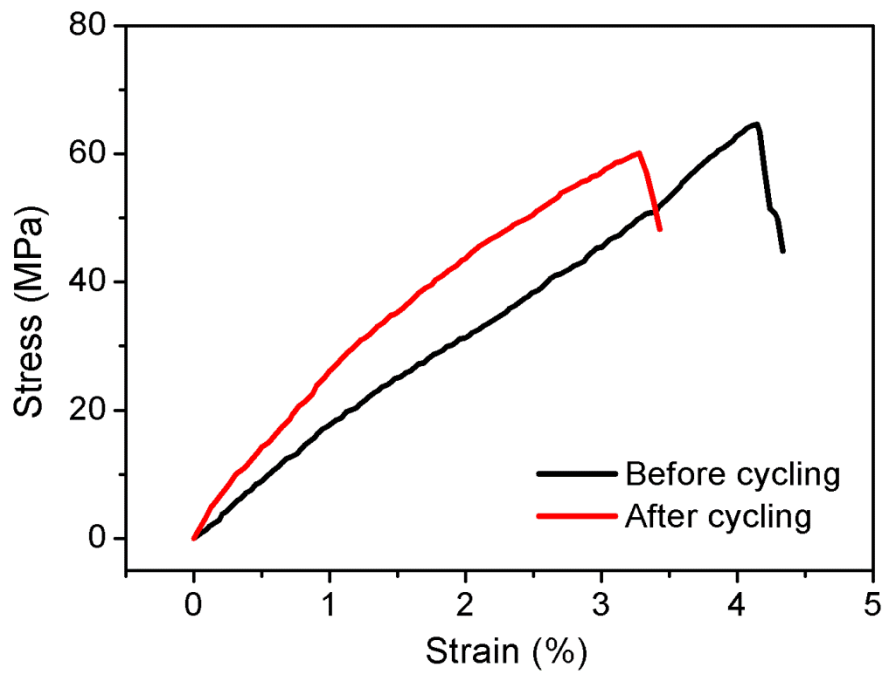

**Figure S3.** Stress-strain curves of 3D aligned CNT/Si hybrid anode before and after being cycled for 100 cycles at a current density of  $5 \text{ A g}^{-1}$  at a voltage range between 3 and 0.005 V.

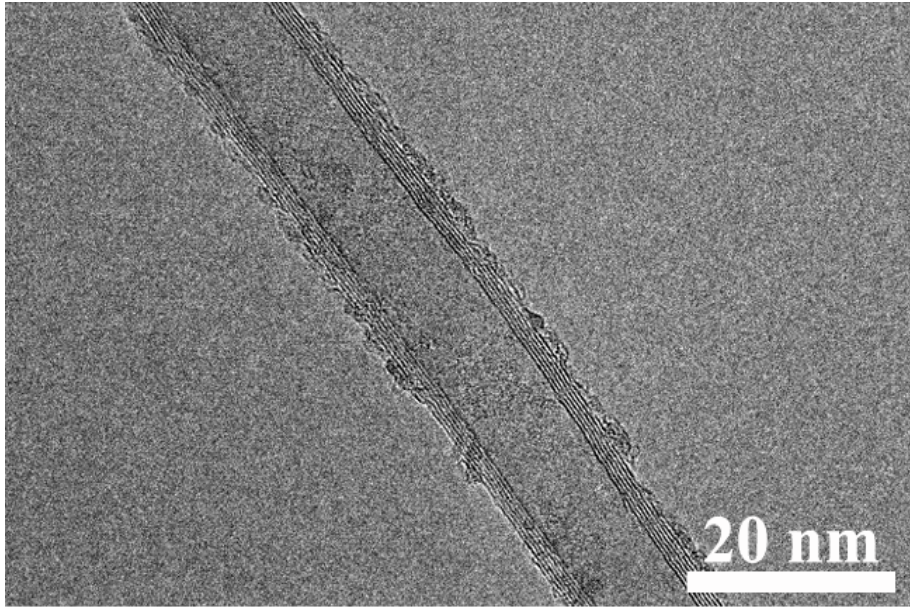

**Figure S4.** TEM image of a CNT.

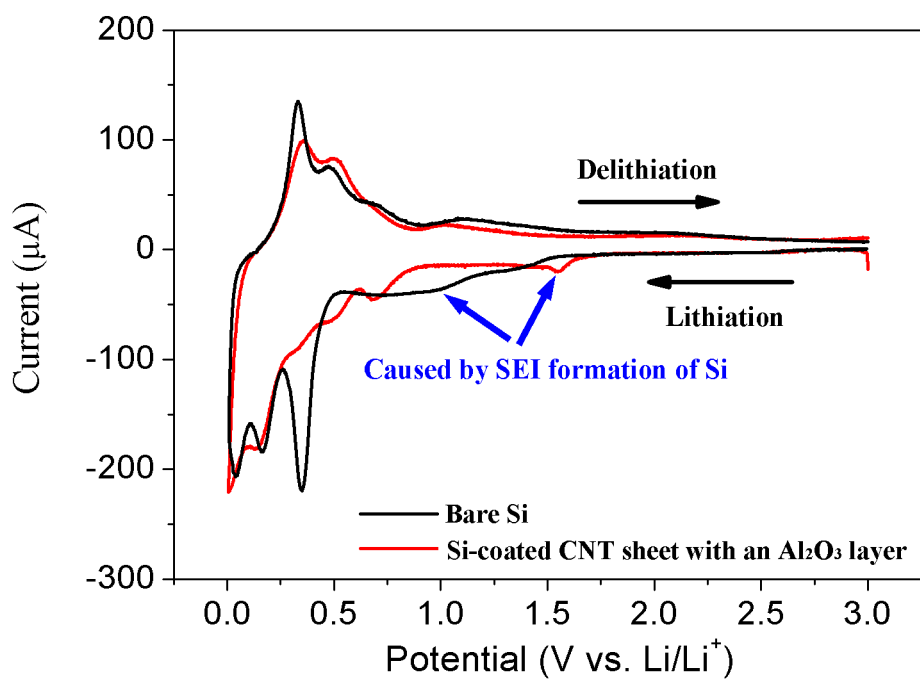

**Figure S5.** Cyclic voltammograms of the bare Si and Si-coated CNT sheet with an Al<sub>2</sub>O<sub>3</sub> layer cycled from 3 to 0.005 V versus Li/Li<sup>+</sup> at a scan rate of 0.1 mV s<sup>-1</sup>. Here SEI corresponds to the solid electrolyte interface.

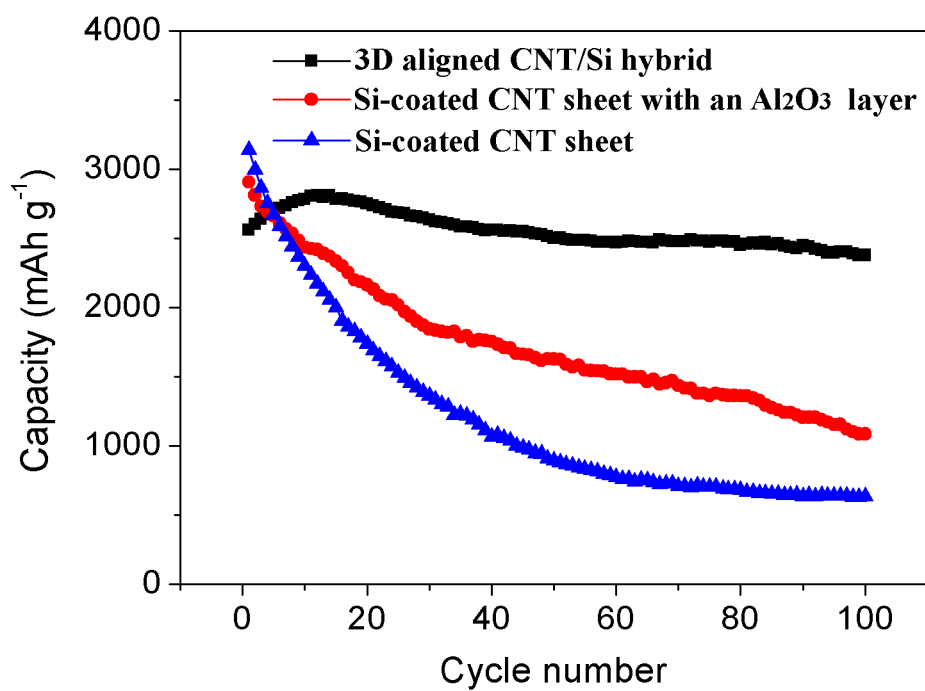

**Figure S6.** Comparison of the electrochemical performance of the Si-coated CNT sheet, Si-coated CNT sheet with an Al<sub>2</sub>O<sub>3</sub> layer and 3D aligned CNT/Si hybrid cycled between 3 and 0.005 V versus Li/Li<sup>+</sup> at 1 A g<sup>-1</sup> for 100 cycles.

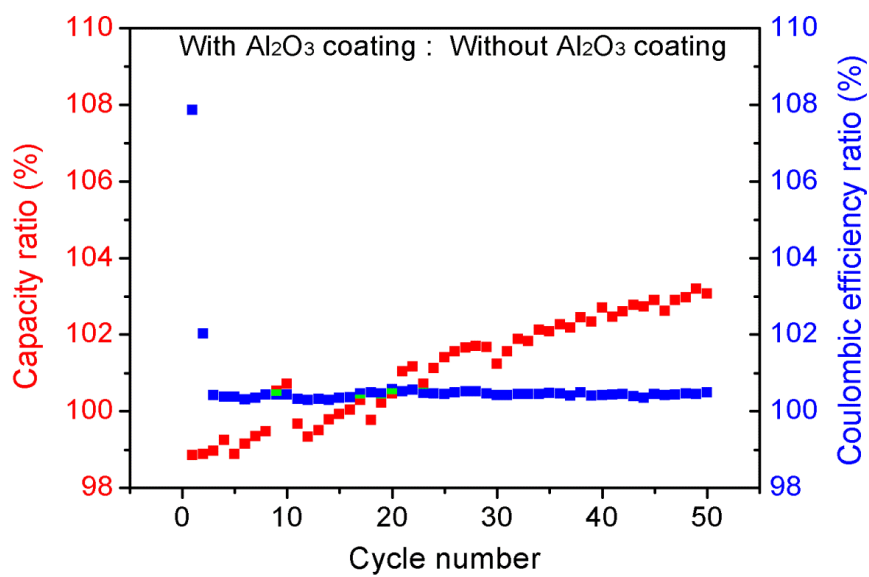

**Figure S7.** Comparison on the electrochemical performance between 3D aligned CNT/Si hybrid with and without an Al<sub>2</sub>O<sub>3</sub> coating. The electrodes were cycled for 50 cycles at a current density of 1 A g<sup>-1</sup> at a voltage range between 3 and 0.005 V.
